# Supplementary material for: Electrochemical SEIRAS Analysis of Imidazole-Ring-Functionalized Self-Assembled Monolayers
Source: MDPI journal article supplement (doi:10.3390/ma15207221), 2022-10-17
Supplement: s1 [file s1]

SUPPLEMENTARY INFORMATION

for

**Electrochemical SEIRAS Analysis of Imidazole-Ring-Functionalized Self-Assembled Monolayers**

Vaidas Pudžaitis <sup>1</sup>, Martynas Talaikis <sup>2,\*</sup>, Rita Sadzevičienė <sup>1</sup>, Linas Labanauskas <sup>1</sup>, Gediminas Niaura <sup>1,2\*</sup>

<sup>1</sup> Department of Organic Chemistry, Center for Physical Sciences and Technology (FTMC), Sauletekio Ave. 3, LT-10257 Vilnius, Lithuania

<sup>2</sup> Department of Bioelectrochemistry and Biospectroscopy, Institute of Biochemistry, Life Sciences Center, Vilnius University, Sauletekio Ave. 7, LT-10257 Vilnius, Lithuania

\*correspondence: martynas.talaikis@gmc.vu.lt, gediminas.niaura@ftmc.lt

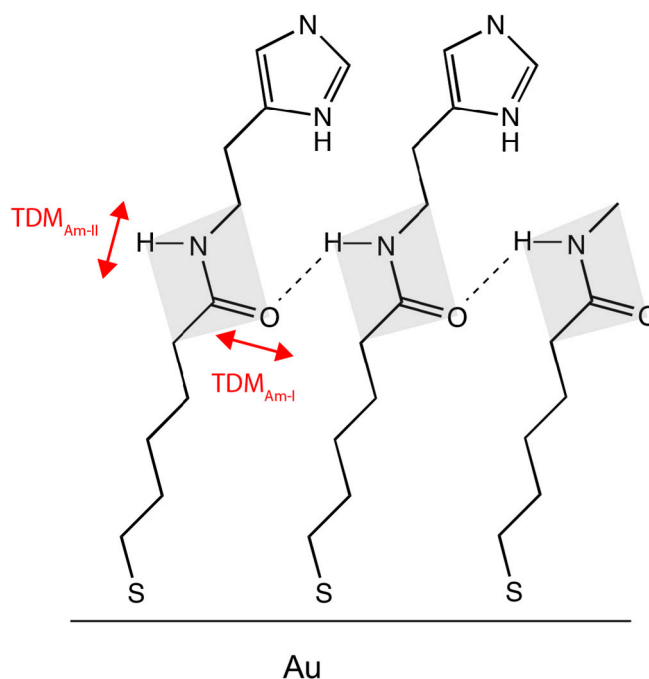

**Figure S1.** 2D schematic representation of interchain hydrogen bond network at the amide group of binary IMHA/Frag monolayer on Au. Shaded areas indicate amide group planes, red lines are the approximate directions of Am-I and Am-II transition dipole moment (TDM) vectors.

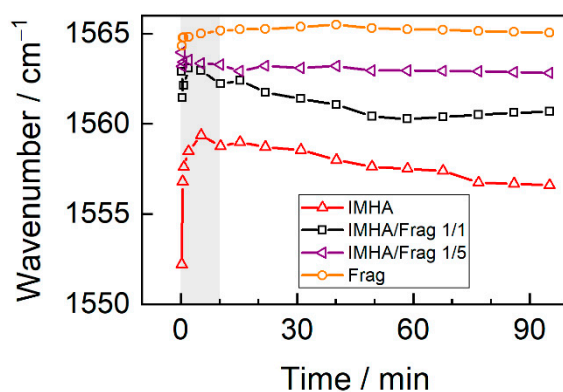

**Figure S2.** Adsorption time dependency of Am-II wavenumbers of SAMs of varied composition.

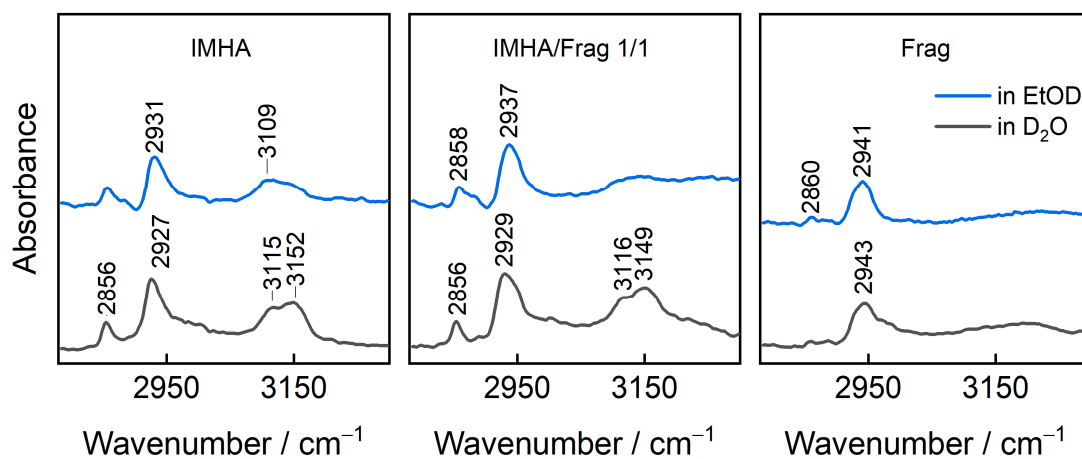

**Figure S3.** SERAS spectra of IMHA, Frag, and binary (IMHA/Frag 1/1) monolayers in ethanol-d6 (EtOD) incubation solution (60 min) and D<sub>2</sub>O.

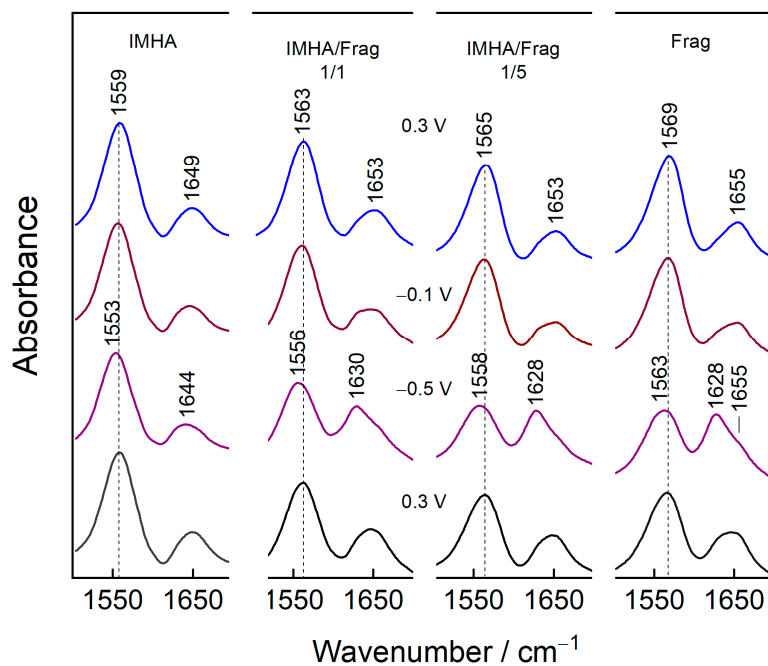

**Figure S4.** Potential dependent SEIRAS spectra of IMHA, IMHA/Frag 1/1, 1/5, and Frag monolayers in amide region in  $\text{H}_2\text{O}$ .

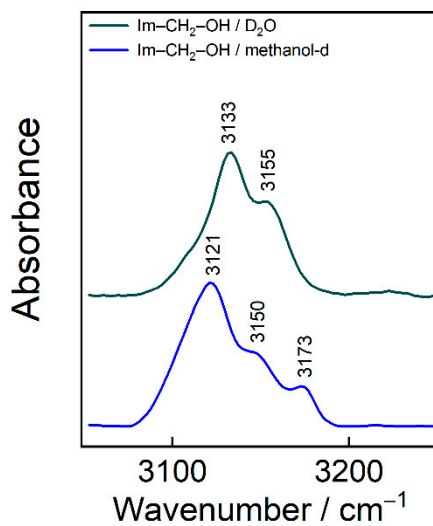

**Figure S5.** Infrared absorption spectra in transmission mode of the imidazole-4-methanol ( $\text{Im-CH}_2\text{-OH}$ ) dissolved in  $\text{methanol-d}_4$  and  $\text{D}_2\text{O}$ .

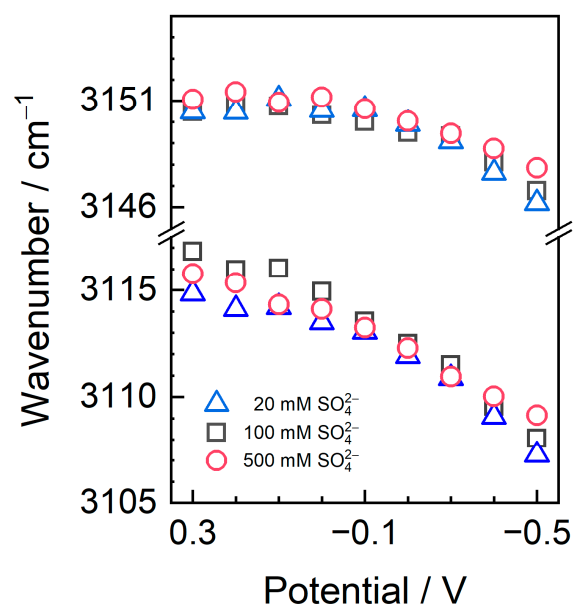

**Figure S6.** The dependence of  $\nu(=C5-H)$  and  $\nu(=C2-H)$  modes positions on the electric potential in the D<sub>2</sub>O solutions of different ionic strengths. SAM was IMHA/Frag 1/1.

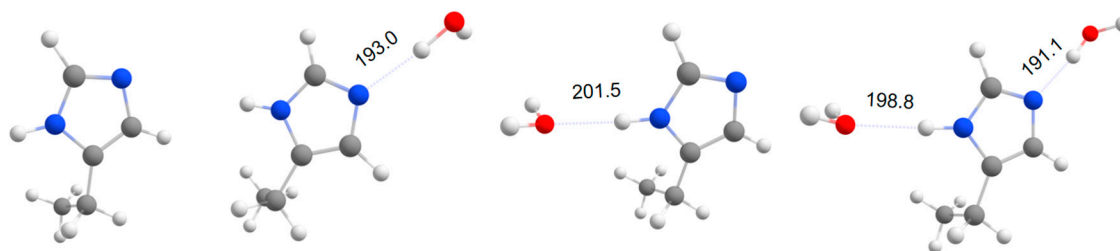

**Figure S7.** 3D representation of geometry-optimized 4-ethyl-1-imidazole and D<sub>2</sub>O complexes. The hydrogen bonding lengths are indicated in pm.

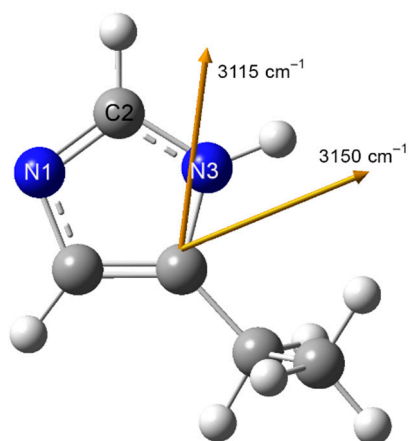

**Figure S8.** Displacement vectors calculated for 3115 and 3150 cm<sup>-1</sup> modes of the 4-ethyl-1-imidazole in Tautomer II form.
